# Supplementary material for: Valence State Manipulation of Cerium Oxide Nanoparticles on a Titanium Surface for Modulating Cell Fate and Bone Formation
Source: PubMed Central journal article supplement (PMC5827567; doi:10.1002/advs.201700678), 2017-12-18
Supplement: ADVS-5-1700678-s001.pdf [file ADVS-5-1700678-s001.pdf]

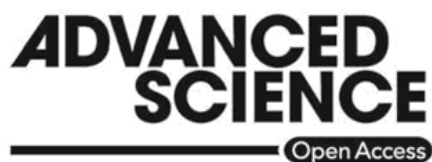

## Supporting Information

for *Adv. Sci.*, DOI: 10.1002/adv.201700678

Valence State Manipulation of Cerium Oxide Nanoparticles  
on a Titanium Surface for Modulating Cell Fate and Bone  
Formation

*Jinhua Li, Jin Wen, Bin Li, Wan Li, Wei Qiao, Jie Shen,  
Weihong Jin, Xinquan Jiang,\* Kelvin W. K. Yeung,\* and Paul  
K. Chu\**

## Supporting Information

**Valence State Manipulation of Cerium Oxide Nanoparticles on Titanium Surface for Modulating Cell Fate and Bone Formation**

*Jinhua Li, Jin Wen, Bin Li, Wan Li, Wei Qiao, Jie Shen, Weihong Jin, Xinquan Jiang \*, Kelvin W. K. Yeung \*, and Paul K. Chu \**

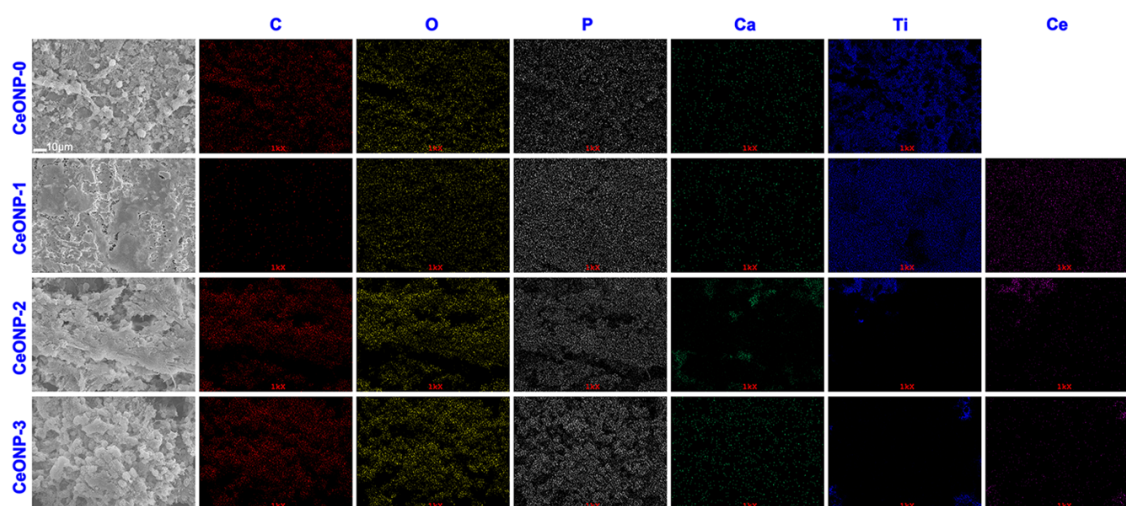

**Figure S1:** Surface morphologies of the implants of various samples, accompanied by the corresponding EDS elemental mapping and distribution of C, O, P, Ca, Ti and Ce.

**Table S1.** Primers for real-time polymerase chain reaction (PCR).

| Gene   | Prime sequence (F, forward; R, reverse)                   | Product size (bp) | Accession number |
|--------|-----------------------------------------------------------|-------------------|------------------|
| GAPDH  | F: GGCAAGTTCAACGGCACAGT<br>R: GCCAGTAGACTCCACGACAT        | 76                | NM_017008.3      |
| Runx-2 | F: CCGAGACCAACCGAGTCATT<br>R: CACTGCACTGAAGAGGCTGT        | 114               | NM_001278483.1   |
| OCN    | F: CAGTAAGGTGGTGAATAGACTCCG<br>R: GGTGCCATAGATGCGCTTG     | 172               | NM_013414.1      |
| OPN    | F: CCAAGCGTGGAAACACACAGCC<br>R: GGCTTTGGA ACTCGCCTGACTG   | 165               | NM_012881.2      |
| ALP    | F: GTCCCACAAGAGCCCACAAT<br>R: CAACGGCAGAGCCAGGAAT         | 172               | NM_013059.1      |
| Col-I  | F: CTGCCCAGAAGAATATGTATCACC<br>R: GAAGCAAAGTTTCCTCCAAGACC | 198               | XM_213440        |
